# Supplementary material for: Radiotherapy and MVA-MUC1-IL-2 vaccine act synergistically for inducing specific immunity to MUC-1 tumor antigen
Source: PubMed Central journal article supplement (PMC5240430; doi:10.1186/s40425-016-0204-3), 2017-01-17

# Supp Figure 1

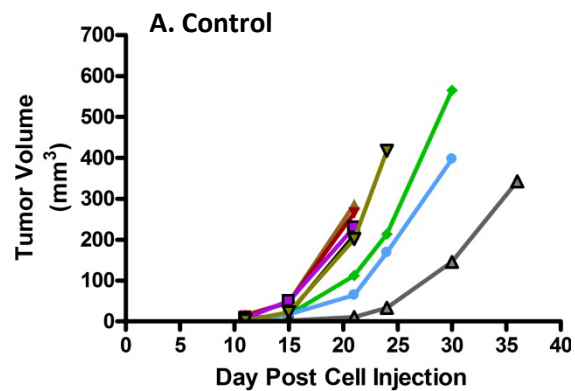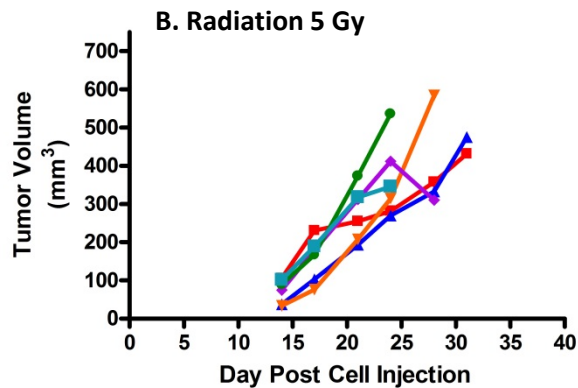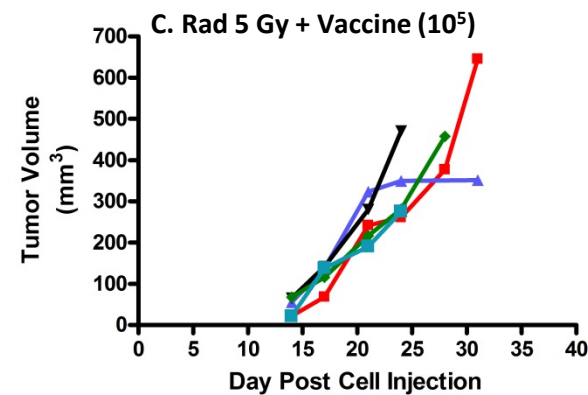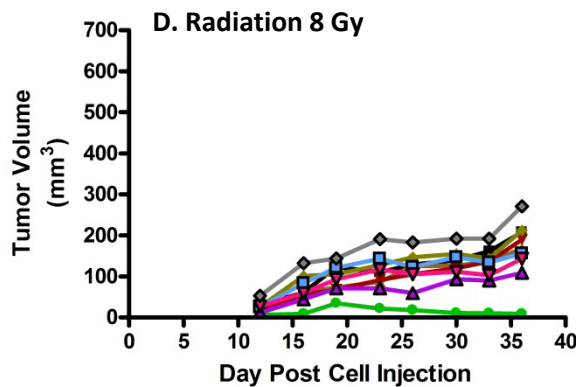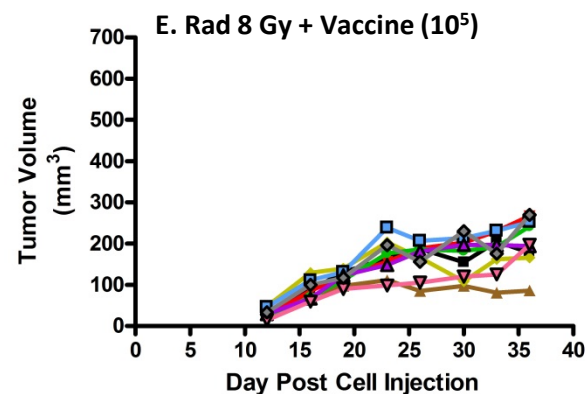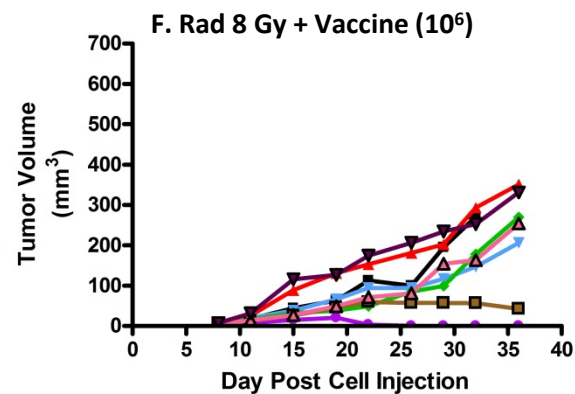

Supplement: 40425_2016_204_MOESM1_ESM.pdf [file 40425_2016_204_MOESM1_ESM.pdf]
